# Supplementary material for: Worldwide variation in human growth and the World Health Organization growth standards: a systematic review
Source: HighWire-hosted journal article supplement (doi:10.1136/bmjopen-2013-003735), 2014-01-01

**Supplemental Figure 1.** Flow diagram of study selection.

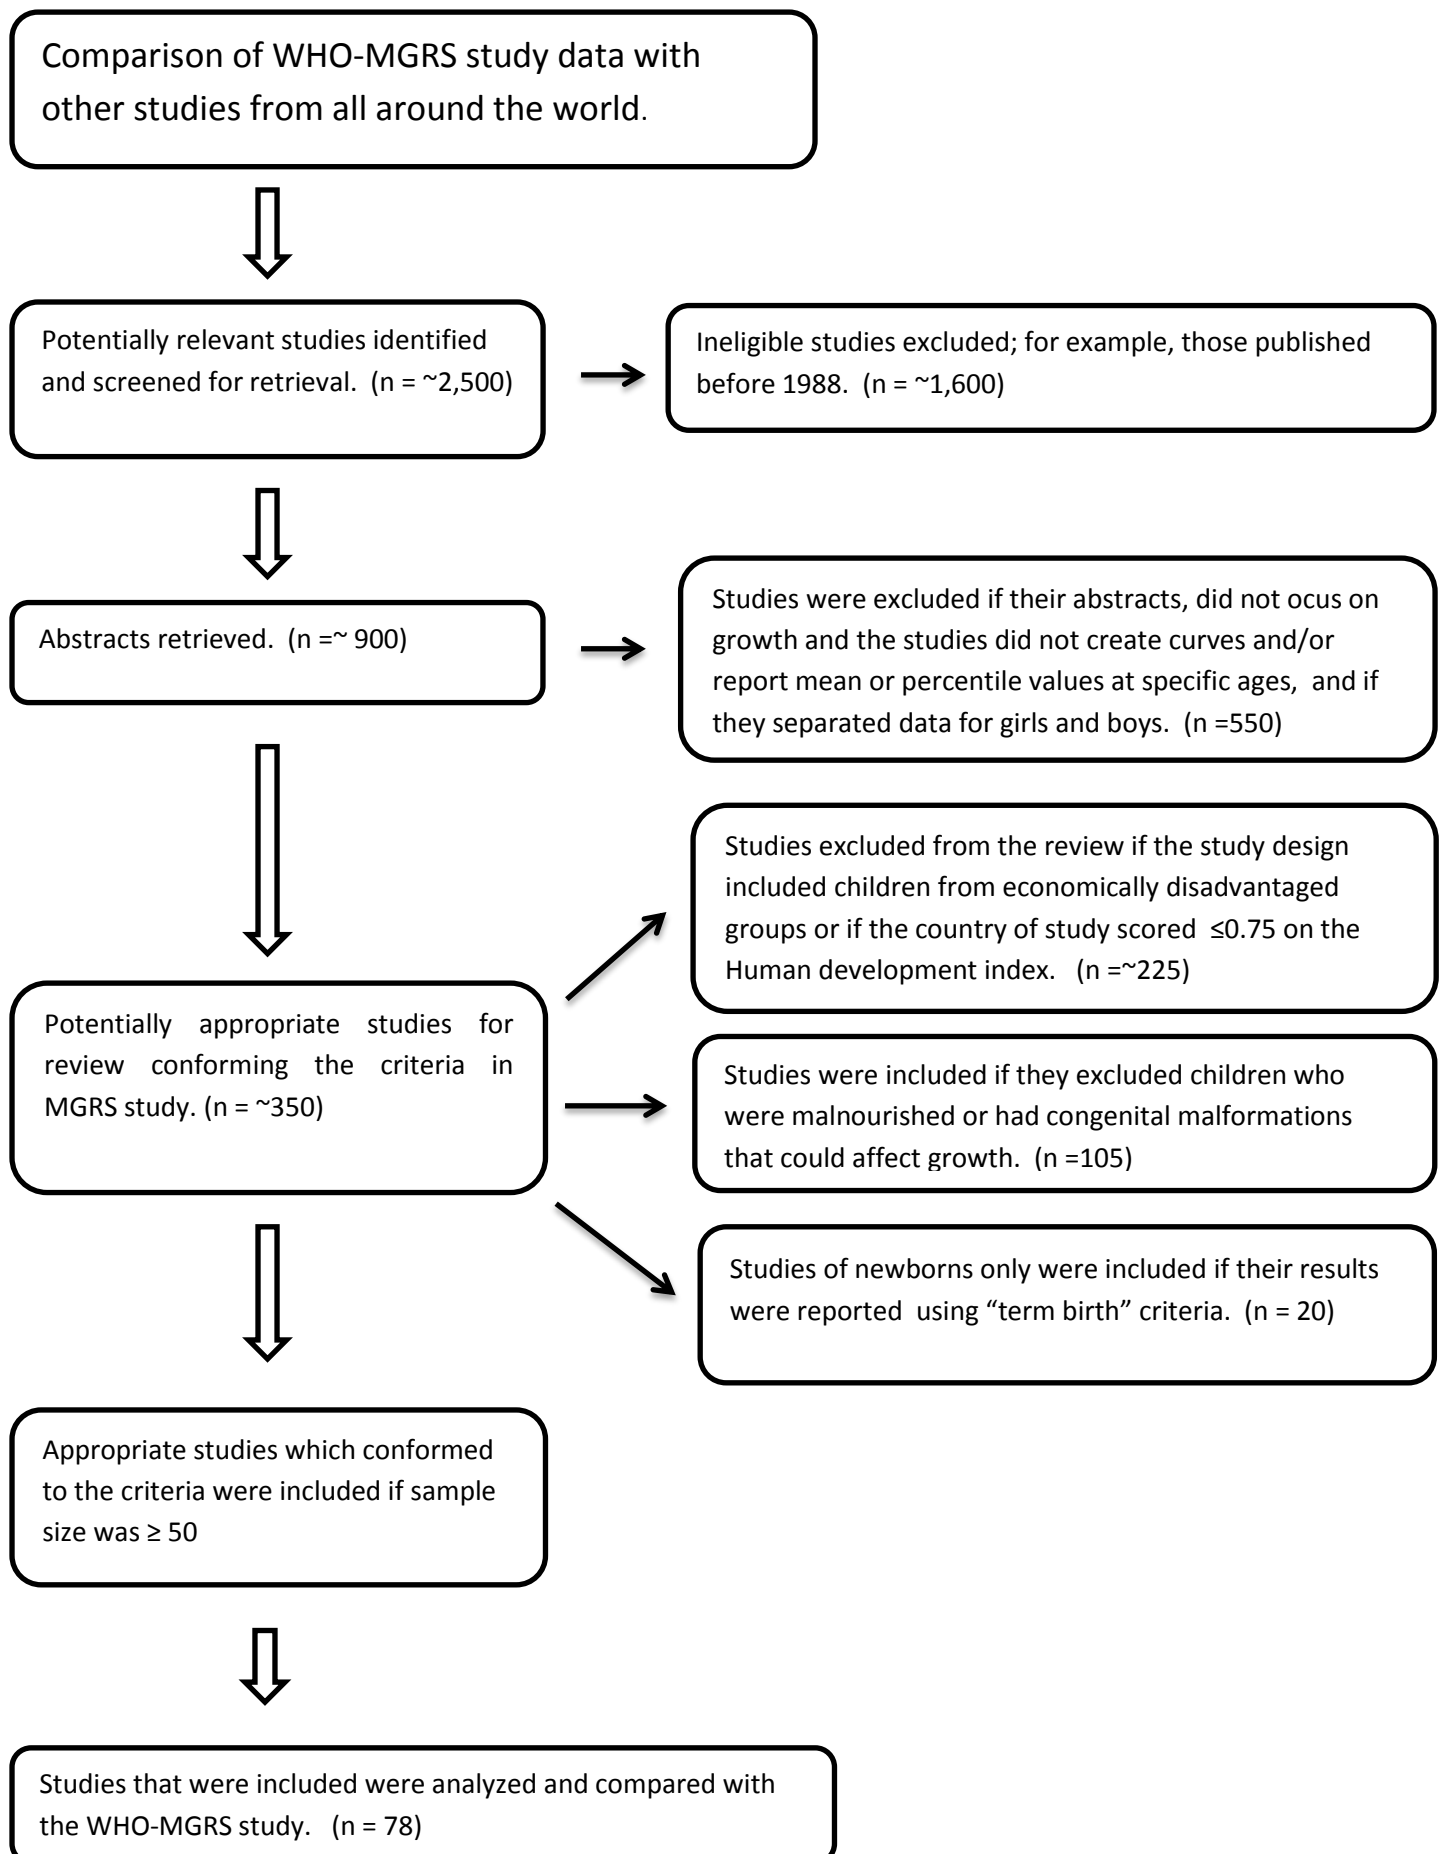

**Supplemental Figure 2. Weight at birth: 54 countries vs. MGRS.** The green box delimits the area within 0.5 SD of the MGRS mean. The green line in the box shows the MGRS mean. *4a. Boys.* MGRS mean: 3.3 kg; SD: 0.55 kg up; 0.40 kg down; *4b. Girls.* MGRS mean: 3.2 kg SD: 0.50 kg up; 0.40 kg down.

**Supplemental Figure 2a**

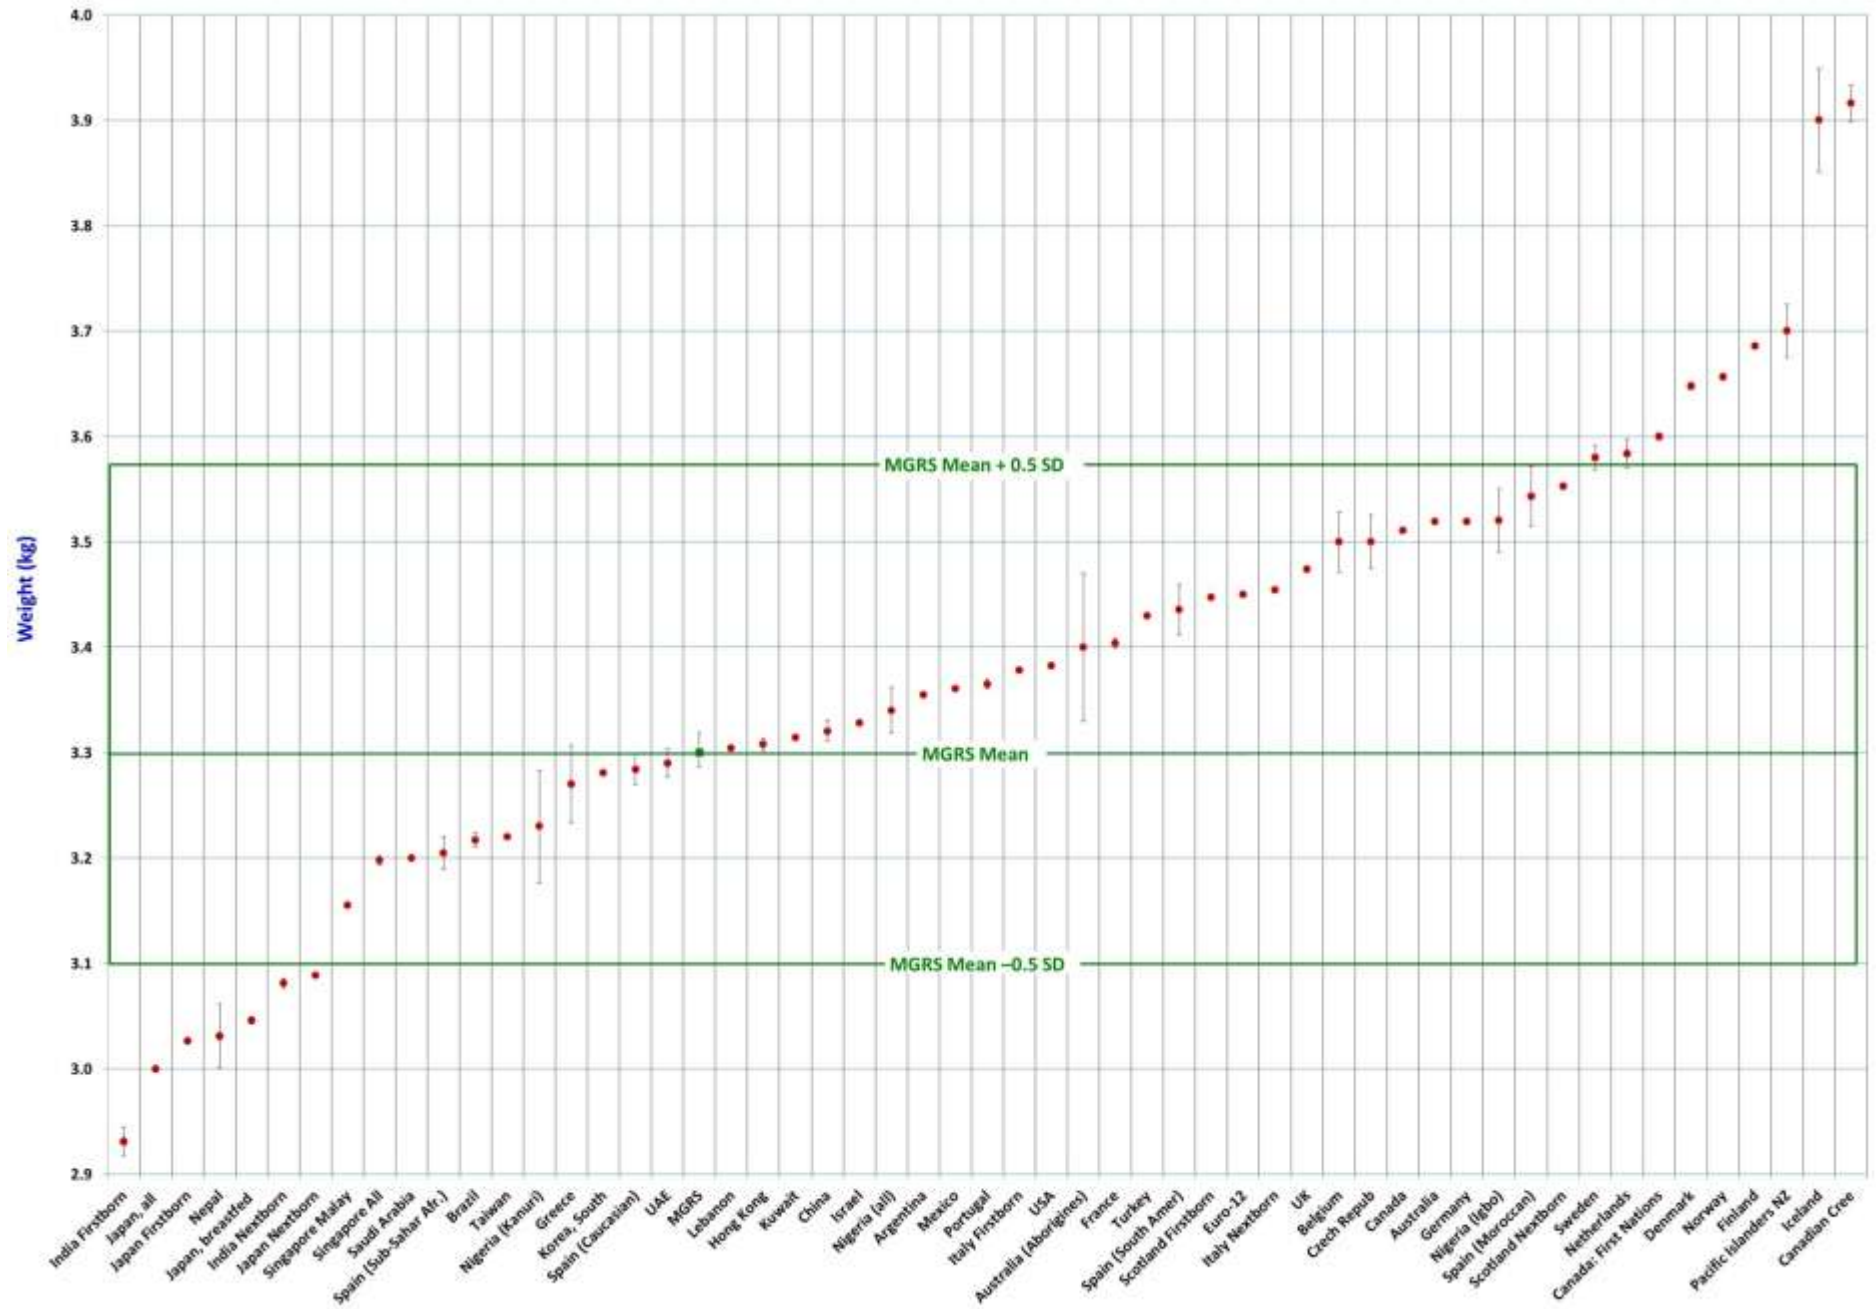

Supplemental Figure 2b

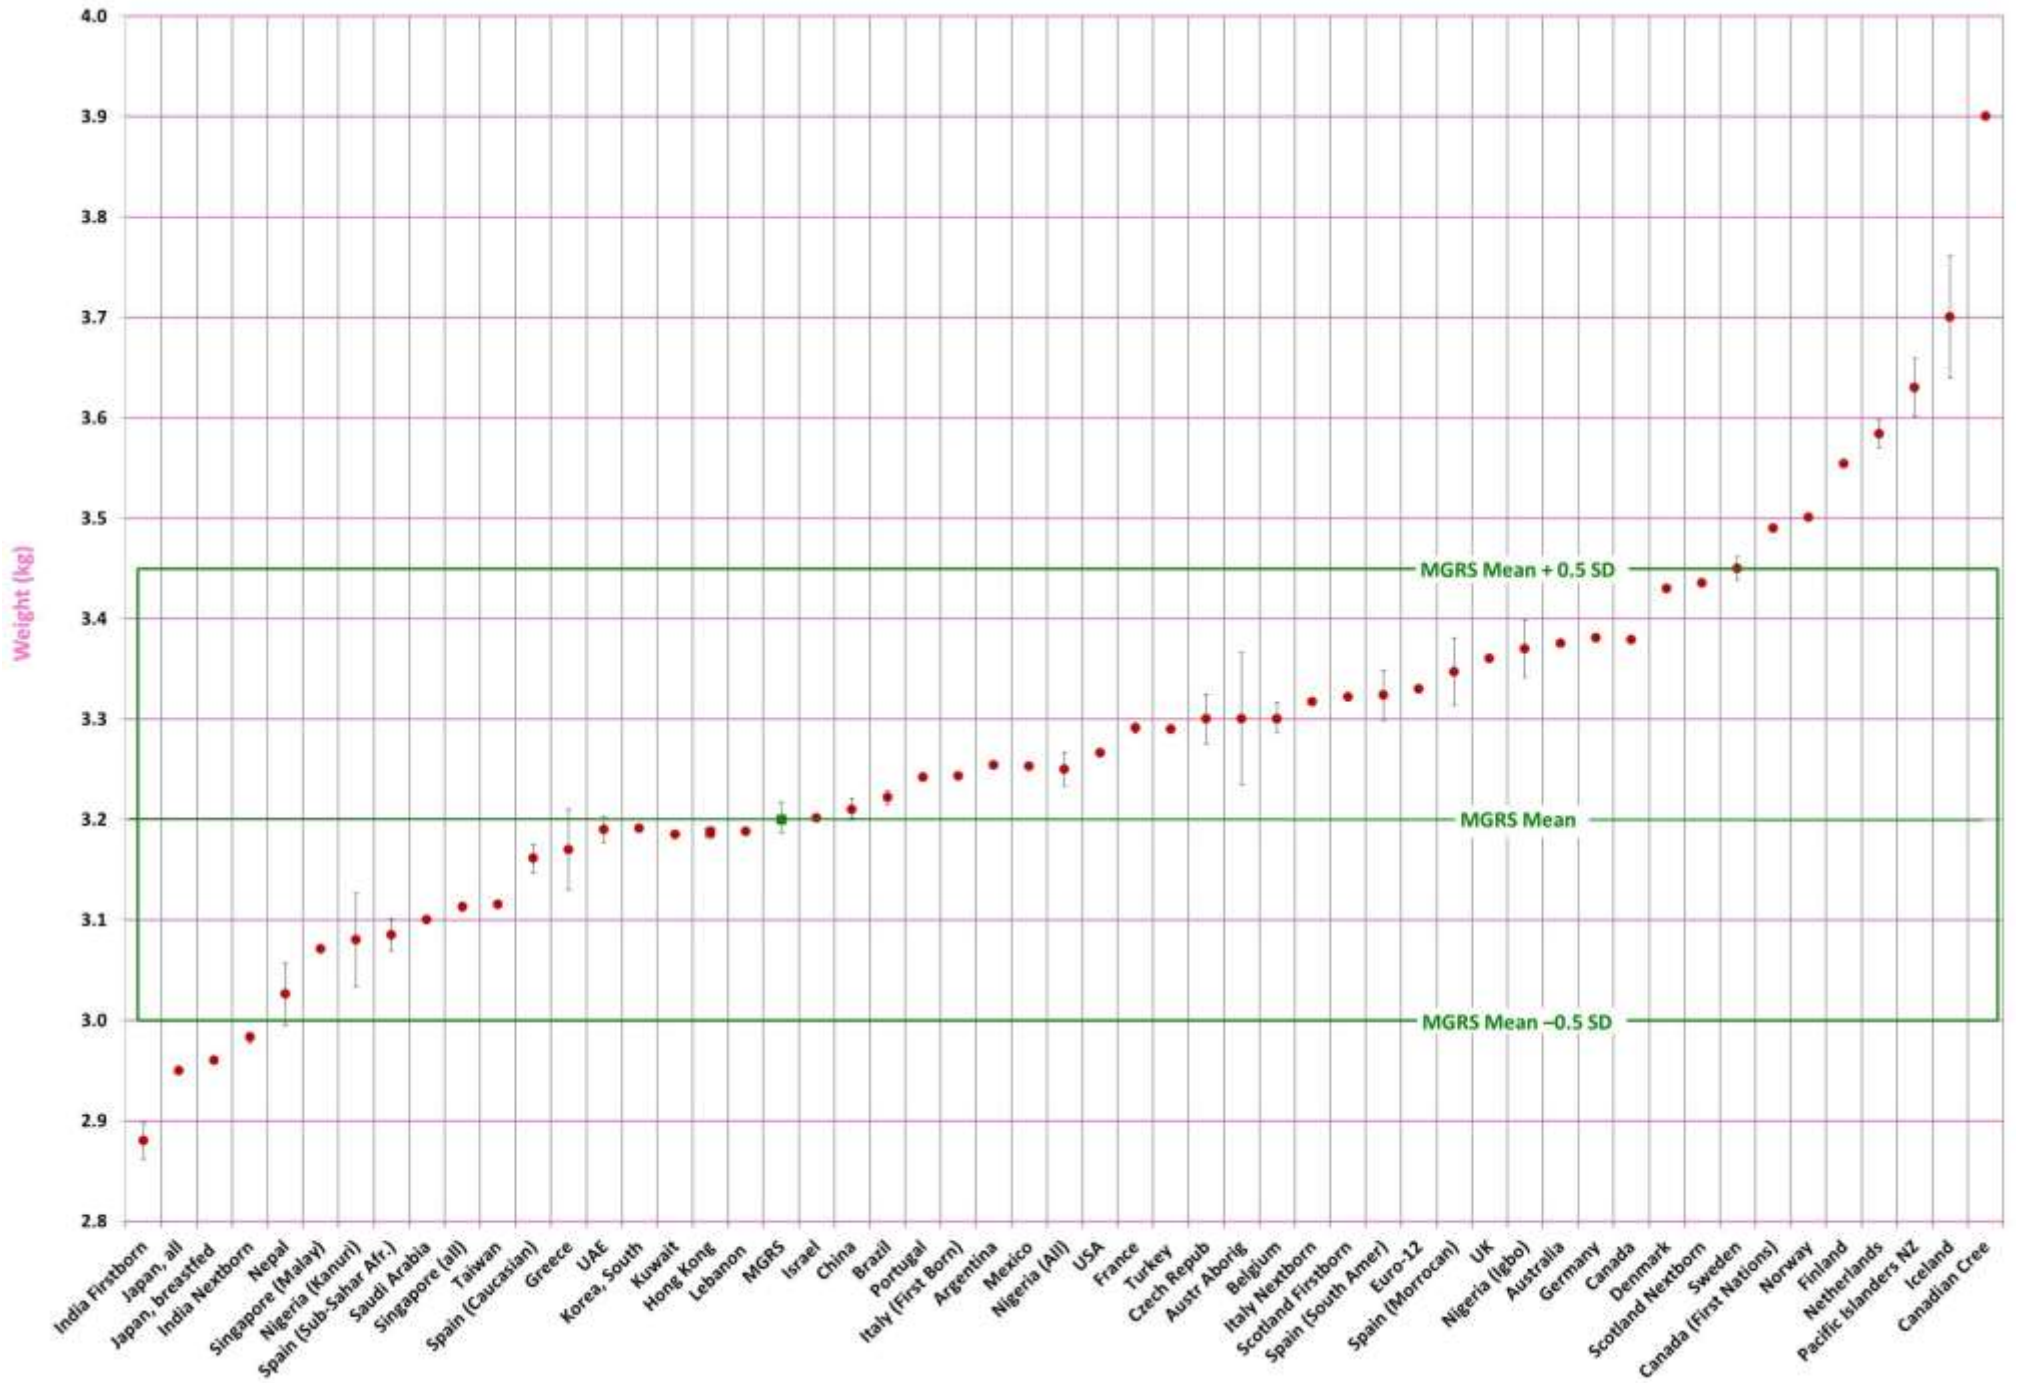

**Supplemental Figure 3. Estimated percentages of extreme outliers (weight) at age 24 months. 4a.** Percentage of boys (blue) or girls (pink) estimated to be above the 97.7<sup>th</sup> percentile on the MGRS curves. 4b. Percentage of boys (blue) or girls (pink) estimated to be below the 2.3<sup>rd</sup> percentile on the MGRS curves. Moroccans in NL = Moroccan people living in the Netherlands.

**Supplemental Figure 3a**

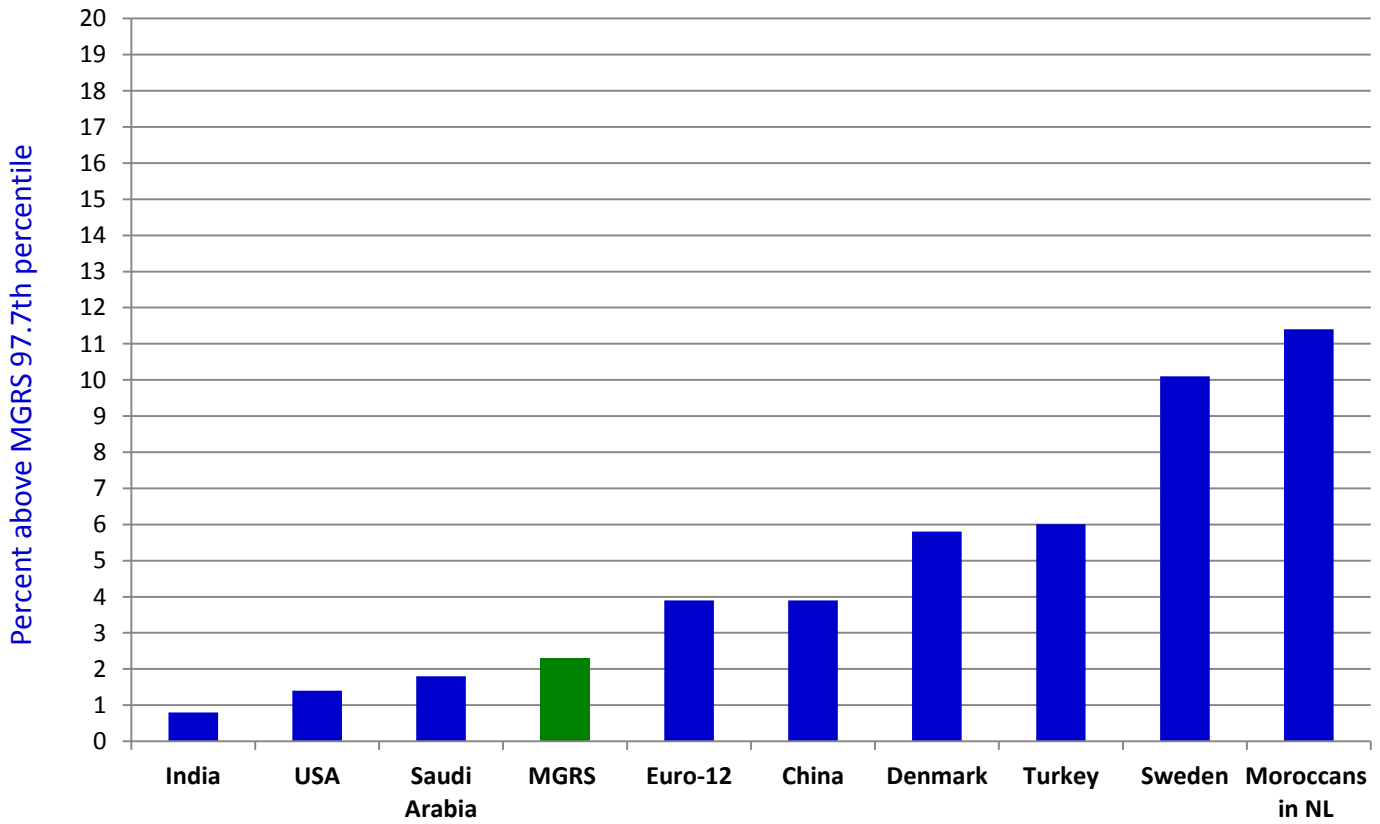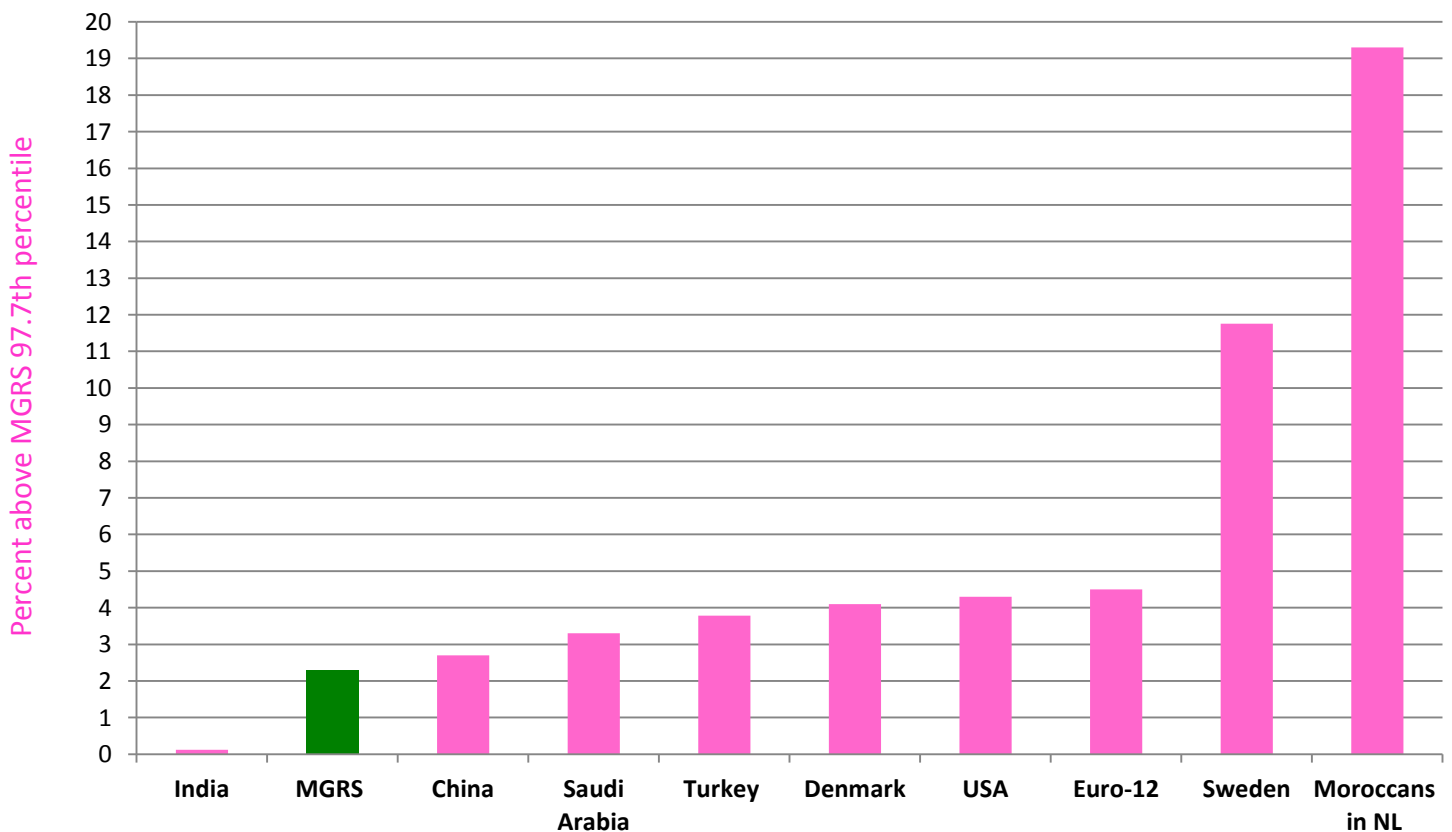

Supplemental Figure 3b

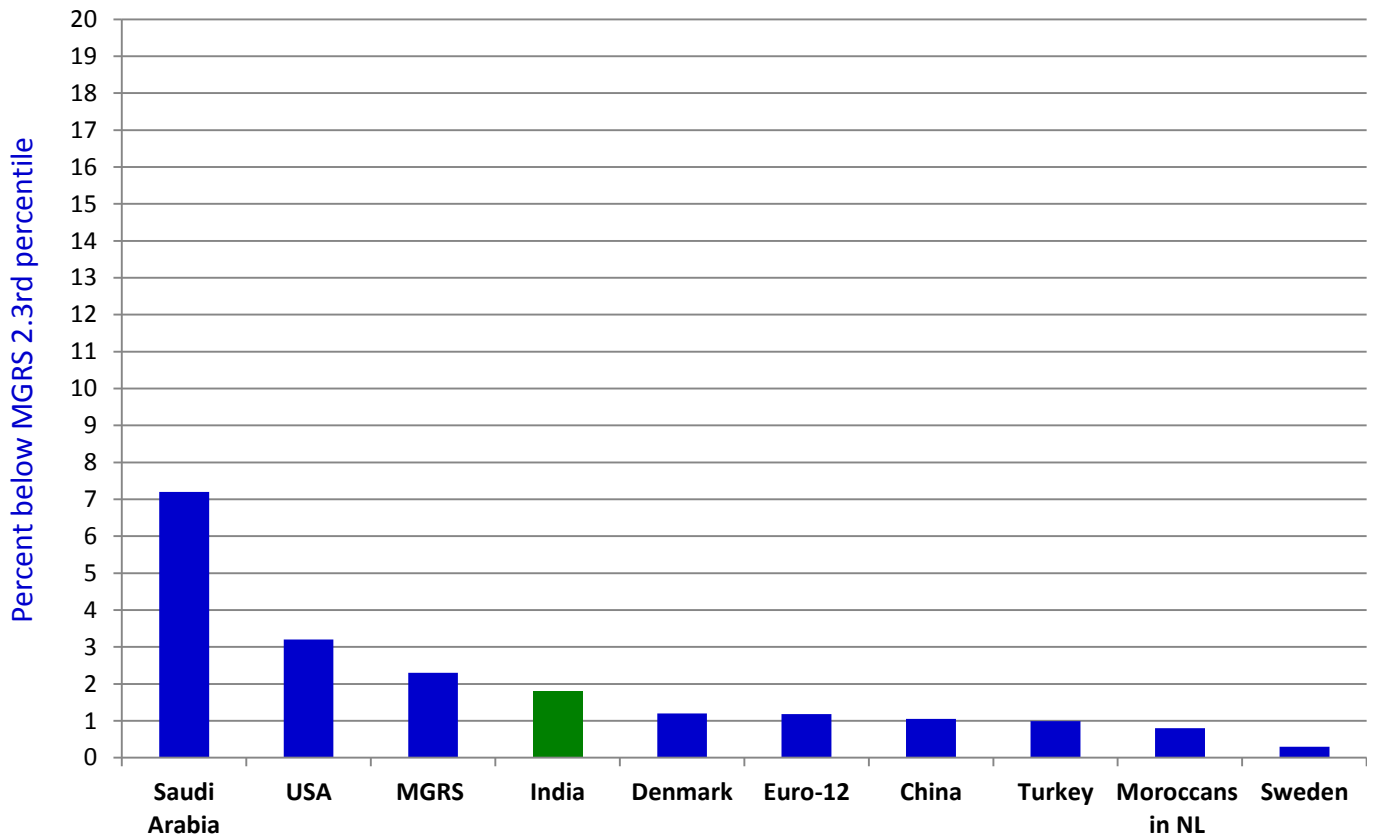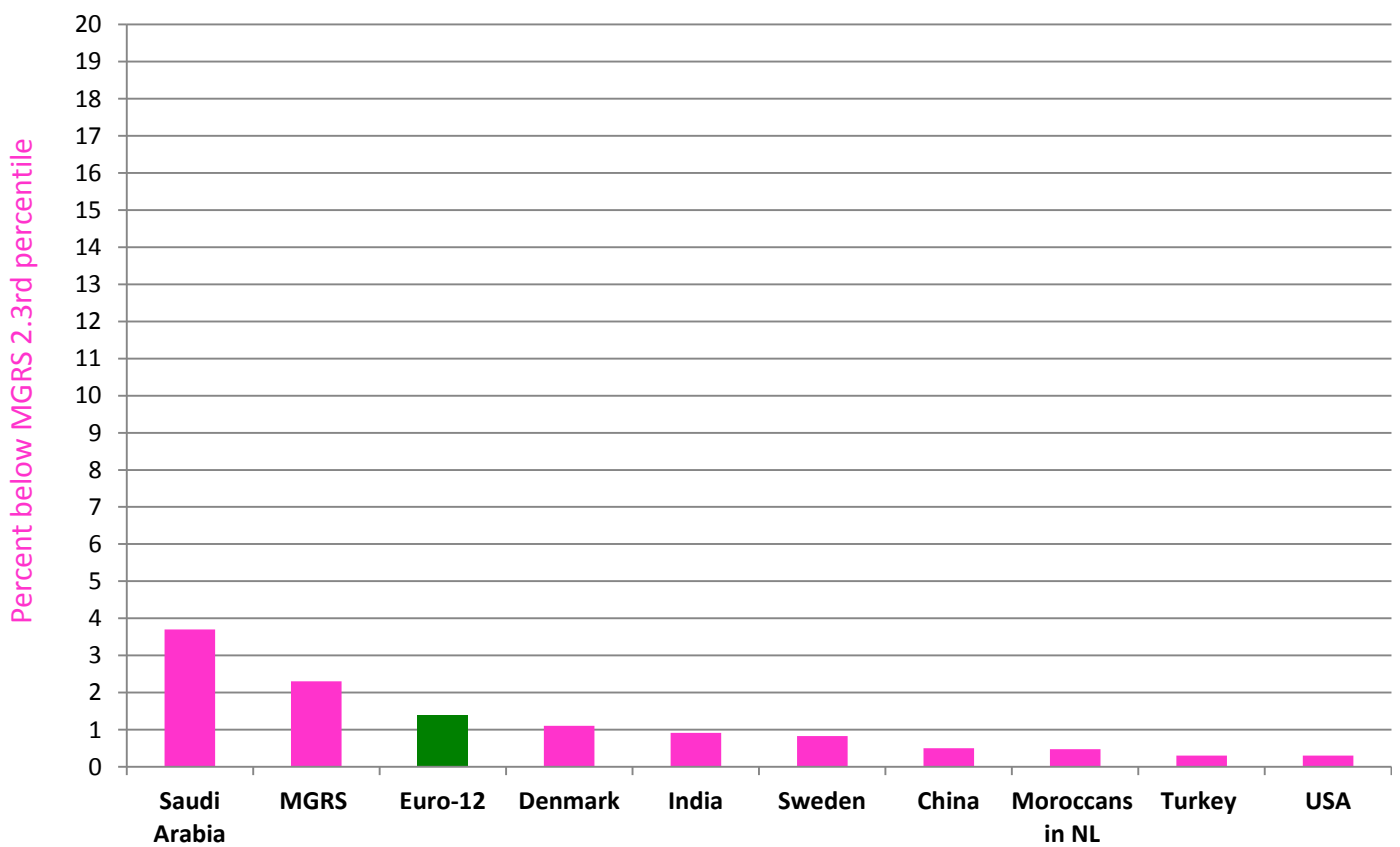

**Supplemental Figure 4. Estimated percentages of extreme outliers (height) at age 24 months. 4a.**

Percentage of boys (blue) or girls (pink) estimated to be above the 97.7<sup>th</sup> percentile on the MGRS curves.

4b. Percentage of boys (blue) or girls (pink) estimated to be below the 2.3<sup>rd</sup> percentile on the MGRS curves.

Moroccans in NL = Moroccan people living in the Netherlands.

**Supplemental Figure 4a**

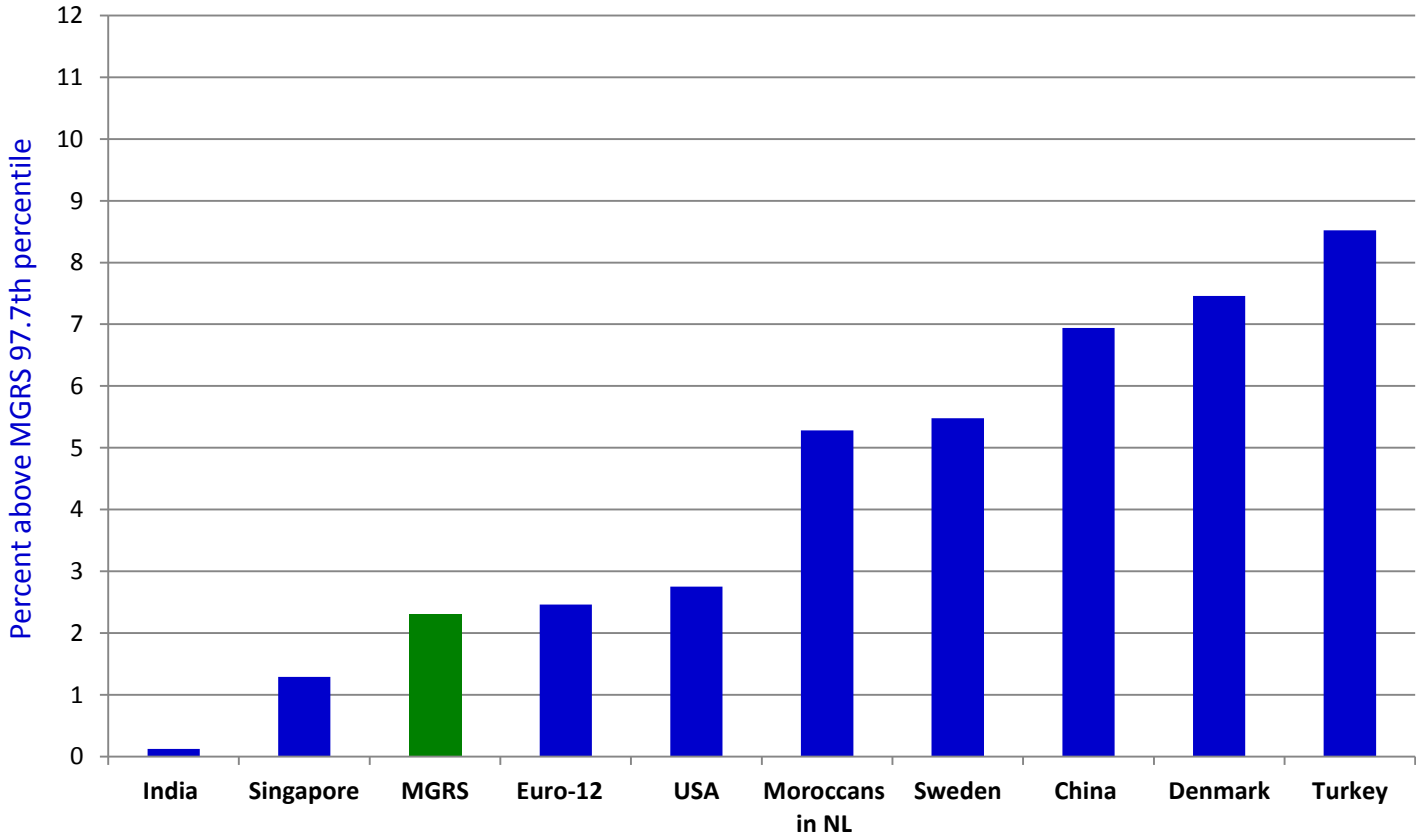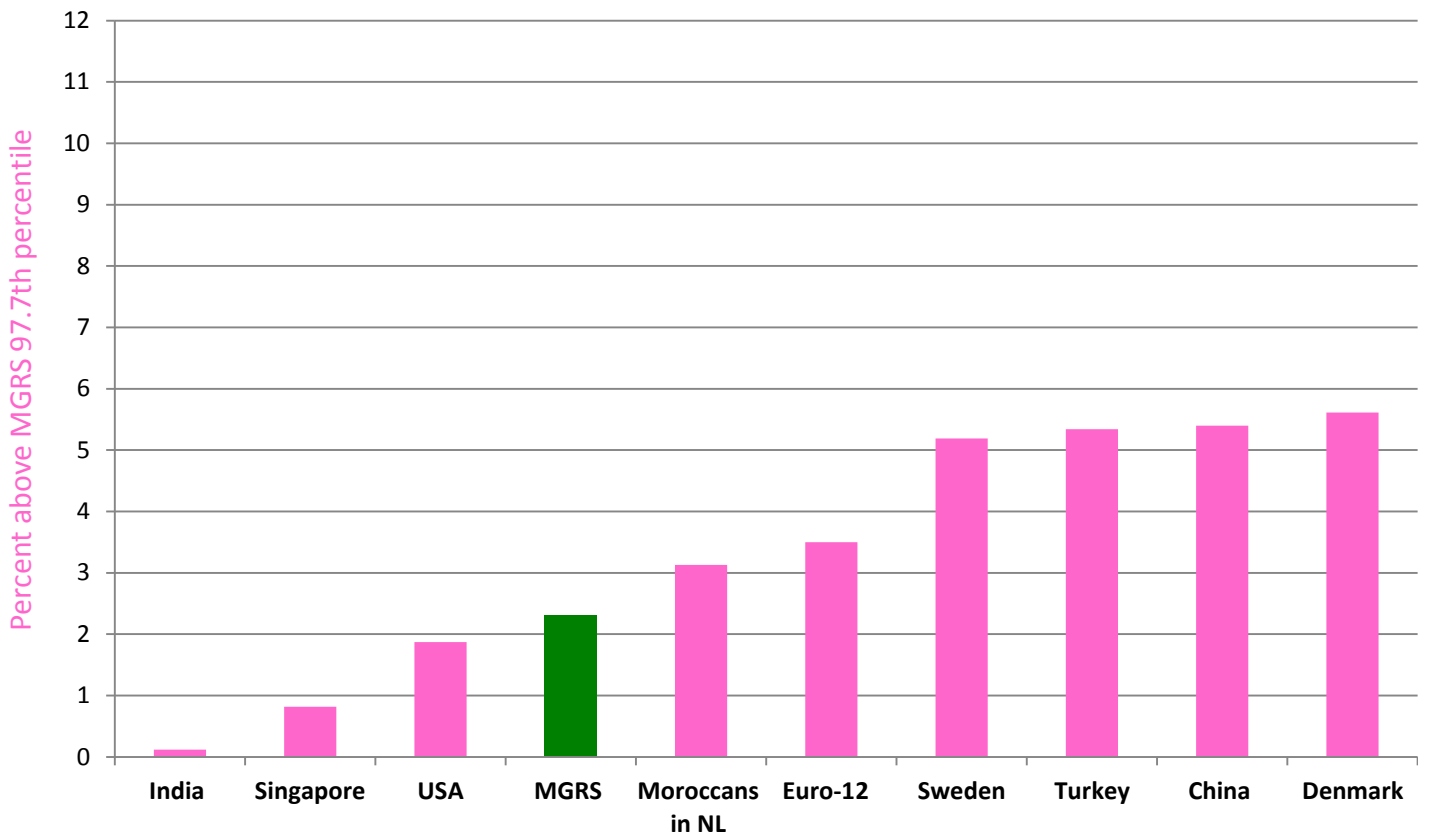

Supplemental Figure 4b

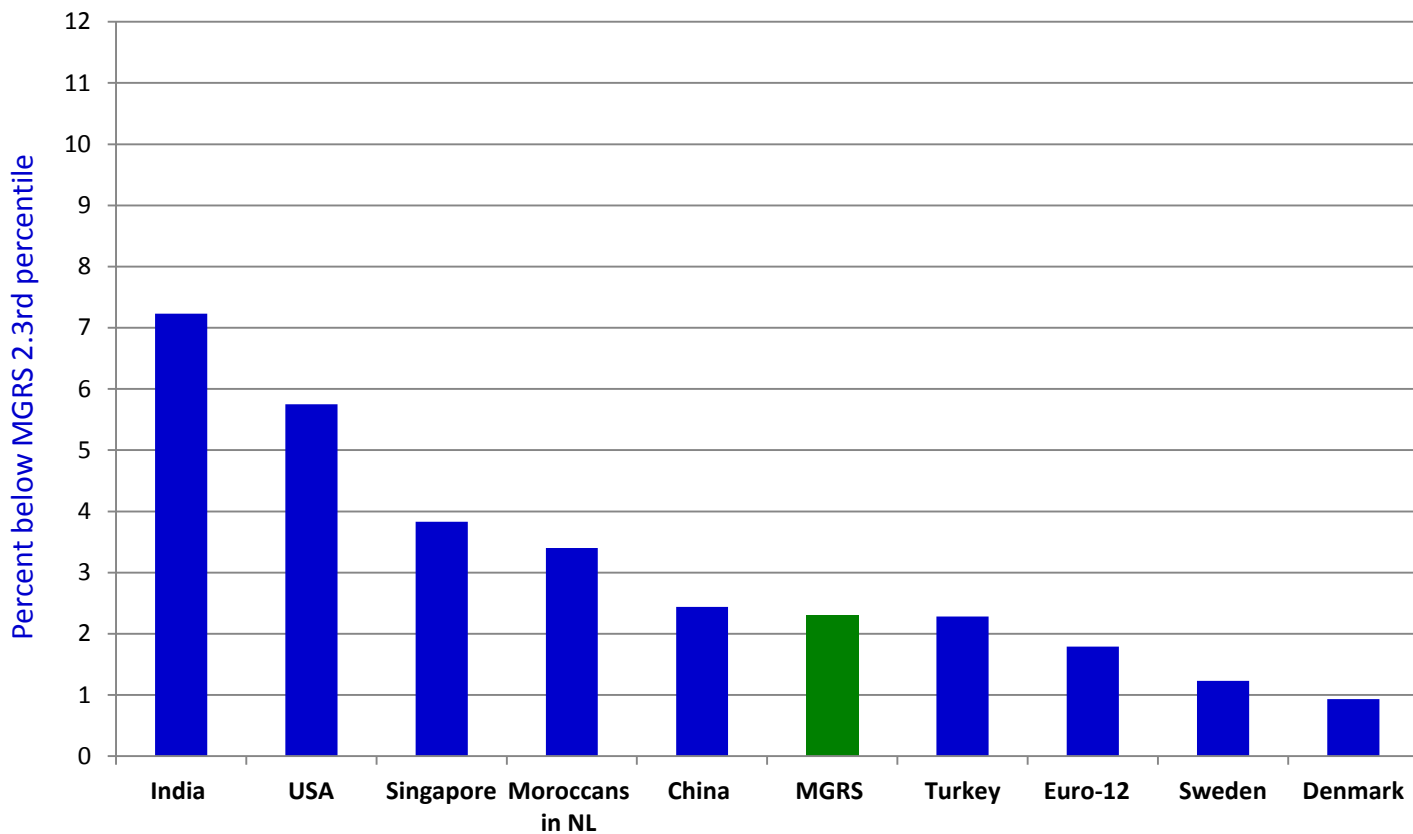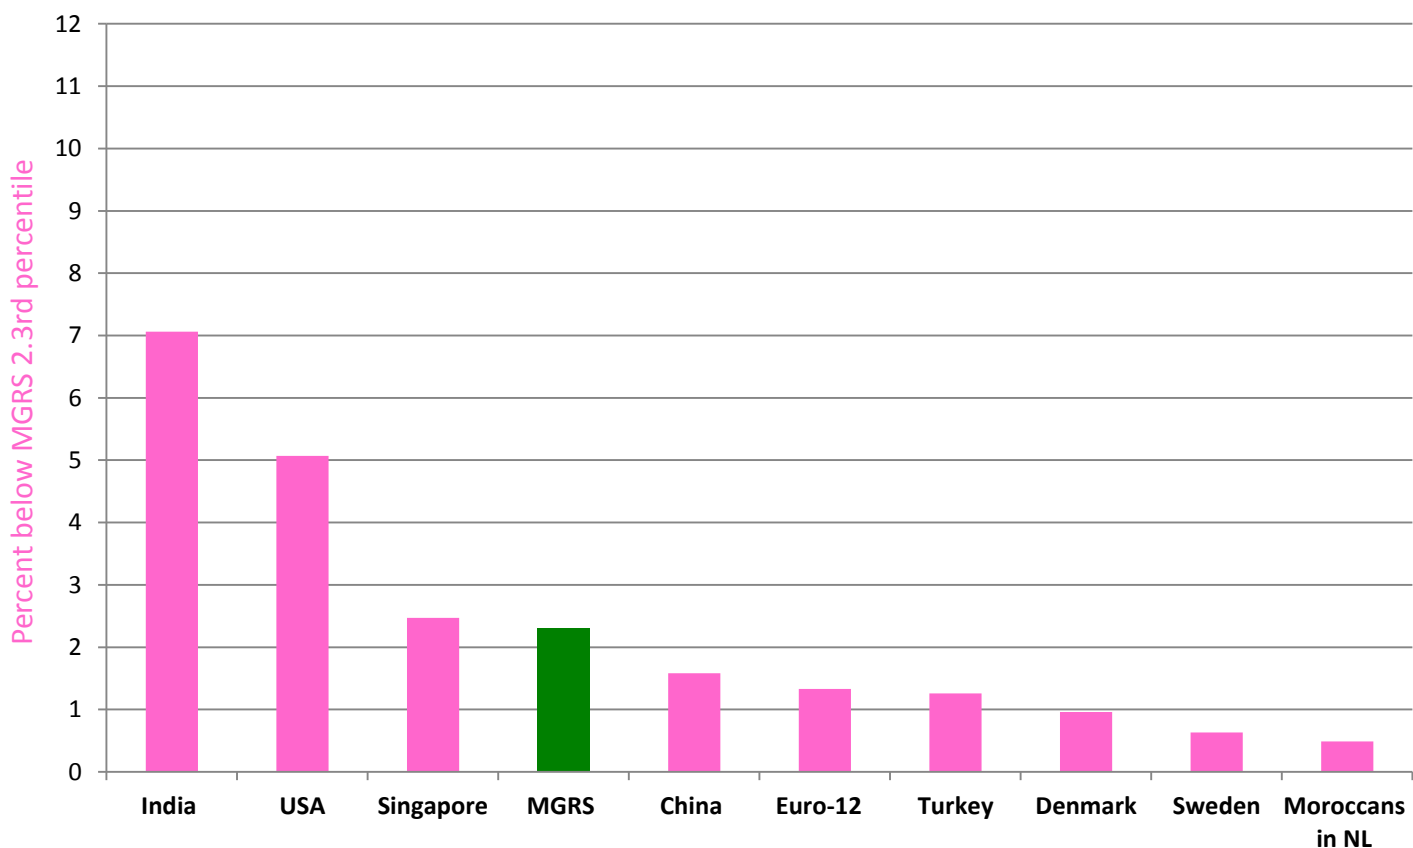

Supplement: bmjopen-2013-003735supp_figure.pdf [file bmjopen-2013-003735supp_figure.pdf]
