# Supplementary material for: Worldwide variation in human growth and the World Health Organization growth standards: a systematic review
Source: HighWire-hosted journal article supplement (doi:10.1136/bmjopen-2013-003735), 2014-01-01
Supplement: bmjopen-2013-003735supp_table.pdf [file bmjopen-2013-003735supp_table.pdf]

**Supplemental Table 1.** Studies included in this systematic review. The number of subjects reflects, to the best of our ability, the number of children included in this review and may be less than the total number of subjects in a given study. Thus, if a study of birthweight reported group sizes for each gestational age from 30 – 43 gestational weeks, we used information only for 37 – 41 weeks and reported only the number of subjects in the 37 – 41 week age groups here.

| # | First Author, year       | Country or group | n, Type*   | What was measured?** | Subject ages     | Inclusion criteria                                                                                                                               | Exclusion criteria                                                              | Bias risk  |
|---|--------------------------|------------------|------------|----------------------|------------------|--------------------------------------------------------------------------------------------------------------------------------------------------|---------------------------------------------------------------------------------|------------|
| 1 | Agarwal, 1994            | India            | 2, 635; M  | Wt, Ht, OFC          | Birth – 6 years  | Affluent according to study criteria (income, education level, other factors), well-nourished                                                    | –                                                                               | Low        |
| 2 | Albertsson-Wikland, 2002 | Sweden           | 4,448; L   | Wt, Ht, OFC          | Birth – 18 years | Final year of school, Gotheburg, willing to provide health records                                                                               | Gestational prematurity or postmaturity, chronic disease or medical treatment   | Low        |
| 3 | Alshimmiri, 2003         | Kuwait           | 23,428; B  | Wt                   | Birth            | Live births in two Kuwaiti hospitals; data sorted by ethnicity, gestational age known; size data for each week from 37–41 weeks stated in tables | Stillbirths, congenital malformations, statistically outlying measurements      | Low        |
| 4 | Anzo, 2002               | Japan            | 16,621; CS | OFC                  | Birth – 6 years  | Children measured in a national survey run by the Japanese Ministry of Health                                                                    | –                                                                               | Low        |
| 5 | Atladdottir, 2000        | Iceland          | 138; L     | Wt, Ht               | Birth – 1 year   | Singletons born between 37 – 41 weeks gestation to Icelandic parents                                                                             | Birth defects or inborn long-term disease, mother did not receive prenatal care | Low        |
| 6 | Beeby, 1996              | Australia        | 22,309; B  | Wt, Ht, OFC          | Birth            | Singletons born between 35 – 43 weeks; size data for each week from 37–41 weeks stated in tables                                                 | Stillbirths, extreme outliers                                                   | Low-Medium |
| 7 | Bertino, 2010            | Italy            | 45,462, B  | Wt, Ht, OFC          | Birth            | Singletons with two parents of Italian origin; size data for each week from 37–41 weeks stated in tables                                         | Hydrops, major congenital anomalies, stillbirths                                | Low        |
| 8 | Bonellie, 2008           | Scotland         | 100,133; B | Wt                   | Birth            | Live singletons registered in Scottish maternity data collection system; data for each week from 37–41 weeks stated in tables                    | Lethal/major congenital anomalies, statistically outlying measurements          | Low        |

\* B = Birth only, L = Longitudinal, CS = Cross-sectional, M = Mixed Longitudinal

\*\*Wt = weight, Ht = Length or Height, OFC = Head circumference

\* B = Birth only, L = Longitudinal, CS = Cross-sectional, M = Mixed Longitudinal

\*\*Wt = weight, Ht = Length or Height, OFC = Head circumference

|    |                 |              |               |             |                      |                                                                                                                                                                                            |                                                                                                                                                                            |            |
|----|-----------------|--------------|---------------|-------------|----------------------|--------------------------------------------------------------------------------------------------------------------------------------------------------------------------------------------|----------------------------------------------------------------------------------------------------------------------------------------------------------------------------|------------|
| 9  | Bordom, 2008    | Libya        | 1473;<br>CS   | Wt, Ht      | Birth –<br>5 years   | Healthy infants and children in two Tripoli and Al-Jabel Al-Gharbi; presence of a health establishment in the commune (quality of services assessed); methodology followed WHO methodology | Chronic disease                                                                                                                                                            | Low        |
| 10 | Braegger, 2011  | Switzerland  | 493;<br>L     | OFC         | Birth –<br>19 years  | Children of Swiss origin in the 1 <sup>st</sup> and 2 <sup>nd</sup> Zurich Longitudinal Study (urban populations)                                                                          | –                                                                                                                                                                          | Low-Medium |
| 11 | Cacciari, 2006  | Italy        | 13,735;<br>CS | Wt, Ht, BMI | 2 years –<br>6 years | Children in infant schools (preschools) throughout Italy.                                                                                                                                  | Parents not of Italian origin                                                                                                                                              | Low-Medium |
| 12 | Cole, 2011      | UK           | 9,443;<br>B   | Wt, Ht, OFC | Birth                | Used existing UK90 data                                                                                                                                                                    | –                                                                                                                                                                          | Low        |
| 13 | Copil, 2006     | Spain        | 4,160;<br>B   | Wt, Ht, OFC | Birth                | Healthy singletons born in a large hospital in Barcelona between 37 and 42 weeks gestation; size data for each week from 37–41 weeks stated in tables                                      | Stillbirths, chronic or gestational maternal disease, maternal drug use, for non-Caucasian group, parents were non-Caucasian and were both of the appropriate ethnic group | Low        |
| 14 | Cunha, 2007     | Portugal     | 24,852, B     | Wt          | Birth                | Singleton births at Hospital Fernando Fonseca, Amadora; size data for each week from 37–41 weeks stated in tables                                                                          | Stillbirths, weight > 5 kg                                                                                                                                                 | Low-Medium |
| 15 | Davidson, 2008  | Israel       |               | Wt, Ht, OFC | Birth                | Singletons; size data for each week from 37–41 weeks stated in tables                                                                                                                      | Stillbirths, statistically outlying measurements                                                                                                                           | Low-Medium |
| 16 | Dawodu, 2008    | UAE          | 2,497, B      | Wt, Ht, OFC | Birth                | Singleton healthy UAE nationals born in at five hospitals in the UAE; size data for each week from 37–41 weeks stated in tables                                                            | Malformations, maternal diabetes, hypertension, heart failure or asthma                                                                                                    | Low        |
| 17 | El Mouzan, 2010 | Saudi Arabia | 35,279;<br>CS | Wt, Ht, OFC | Birth –<br>19 years  | Saudis living throughout the kingdom.                                                                                                                                                      | Birthweight <2500 g, chronic disorders including congenital malformations or syndromes known to affect growth                                                              | Low        |

\* B = Birth only, L = Longitudinal, CS = Cross-sectional, M = Mixed Longitudinal

\*\*Wt = weight, Ht = Length or Height, OFC = Head circumference

|    |                                           |                     |                |             |                    |                                                                                                                                                        |                                                                                                                                                    |            |
|----|-------------------------------------------|---------------------|----------------|-------------|--------------------|--------------------------------------------------------------------------------------------------------------------------------------------------------|----------------------------------------------------------------------------------------------------------------------------------------------------|------------|
| 18 | Fok, 2003                                 | Hong Kong           | 8,557;<br>B    | Wt, Ht, OFC | Birth              | Singletons of ethnic Chinese origin born between 24-43 weeks of gestation; size data for each week from 37–41 weeks stated in tables                   | Moribund condition at birth, major congenital malformations, chromosomal abnormalities, gestational age undetermined                               | Low-medium |
| 19 | Fredriks, 2000                            | Netherlands         | 14,500;<br>CS  | Wt, Ht, OFC | 2 weeks – 21 years | Children of Dutch origin (at least one Dutch parent, other parent western European)                                                                    | Diagnosed growth disorders, use of medications known to interfere with growth                                                                      | Low        |
| 20 | Fredriks, 2004                            | Netherlands         | 2,882;<br>CS   | Wt, Ht, OFC | 3 weeks – 20 years | Children with both parents Moroccan (99.5%) or one Moroccan parent and other parent born in North Africa. Living in 4 large cities in the Netherlands. | Diagnosed growth disorders and children on medication known to interfere with growth                                                               | Low        |
| 21 | Guihard-Costa, 1997                       | France              | 16,877;<br>B   | Wt, Ht, OFC | Birth              | Singletons born in Hauts-de-Seine; size data for each week from 37–41 weeks stated in tables                                                           | One or more parents not born in France, mother had undergone several prenatal exams.                                                               | Low-Medium |
| 22 | Haschke, 2000                             | Europe (12 nations) | 2,145; L       | Wt, Ht, OFC | Birth – 36 months  | Singletons born at term (37 – 44 weeks)                                                                                                                | Intrauterine growth aberration, maternal diabetes or epilepsy, father unknown, birthweight <2500 g, congenital malformations or metabolic diseases | Low        |
| 23 | Health and Human Services, Dep't of (CDC) | United States       | Unknown;<br>CS | Wt, Ht, OFC | Birth – 18 years   | US children of different races and ethnicities                                                                                                         | Very low birthweight infants (infant charts only), extreme statistical outliers                                                                    | Low medium |
| 24 | Hoey, 1990                                | Ireland             | 3,138;<br>CS   | OFC         | 5 – 19 years       | Rural and urban Irish schoolchildren of different SES classes (Ireland had a high HDI ranking in 1990)                                                 | Chronic illnesses, non-Irish parents, inadequate information obtained or available                                                                 | Low        |
| 25 | Hof, 2011                                 | Netherlands         | 3871;<br>L     | Wt, Ht, OFC | Birth – 3 years    | For Dutch children: mother born in the Netherlands                                                                                                     | –                                                                                                                                                  | Low medium |
| 26 | Hsieh, 2006                               | Taiwan              | 1,298,389 B    | Wt          | Birth              | Singletons with data in the Ministry of Interior birth registry, (data for each week from 37–41 weeks stated in tables)                                | Stillbirths, extreme outliers, registrations entered > 3 months after birth                                                                        | Low medium |
| 27 | Júlíusson, 2009                           | Norway              | 7,291; CS      | Wt, Ht, OFC | Birth – 5 years    | Children whose parents were natives of Northern Europe                                                                                                 | Chronic diseases, prematurity                                                                                                                      | Low        |

\* B = Birth only, L = Longitudinal, CS = Cross-sectional, M = Mixed Longitudinal

\*\*Wt = weight, Ht = Length or Height, OFC = Head circumference

|    |                                                        |                   |                               |             |                   |                                                                                                                                                                  |                                                                                                                                                                                                                                                                                                                                                             |            |
|----|--------------------------------------------------------|-------------------|-------------------------------|-------------|-------------------|------------------------------------------------------------------------------------------------------------------------------------------------------------------|-------------------------------------------------------------------------------------------------------------------------------------------------------------------------------------------------------------------------------------------------------------------------------------------------------------------------------------------------------------|------------|
| 28 | Kandraju, 2011                                         | India (south)     | 28,790 (OFC) – 31,391 (Wt); B | Wt, Ht, OFC | Birth             | Singletons born in Level III hospital in South India; size data for each week from 37–41 weeks stated in tables                                                  | Major congenital anomalies, uncertain gestational age                                                                                                                                                                                                                                                                                                       | Low-Medium |
| 29 | Kheng, 2011                                            | Singapore         | 19,634; B                     | Wt          | Birth             | Singletons                                                                                                                                                       | Stillbirth, congenital anomalies, sex, parity, or gestational age unknown, extreme outliers, not Chinese, Malay, or Indian                                                                                                                                                                                                                                  | Low-Medium |
| 30 | KiGGS, 2011                                            | Germany           | 17,158; CS                    | Wt, Ht, OFC | Birth – 17 years  | Nationwide study (all parts of Germany)                                                                                                                          | Prematurity (in children up to age 1), chronic renal or gastrointestinal diseases, primary or secondary short stature ( e.g. Down syndrome, cystic fibrosis), tall stature due precocious puberty or disease, tuberculosis, microcephaly, macrocephaly, cancers, congenital heart disease, use of growth hormones, steroid use, ADHD-drug use, tuberculosis | Low        |
| 31 | Korea Centers for Disease Control and Prevention, 2007 | Republic of Korea | 142,945; CS                   | Wt, Ht, OFC | Birth – 18 years  | Children living throughout South Korea; 0-6 years: children were enrolled in university hospitals and childcare facilities                                       | –                                                                                                                                                                                                                                                                                                                                                           | Low-Medium |
| 32 | Karvonen, 2012                                         | Finland           | 19,715; L                     | OFC         | Birth – 7 years   | Children born or living in Espoo; data came from an anonymized database                                                                                          | Diseases or medications affecting growth; measurements made outside scheduled visits, measurements outside $\pm 5$ SD                                                                                                                                                                                                                                       | Low        |
| 33 | Kramer, 2001                                           | Canada            | 675,909; B                    | Wt          | Birth             | Singletons born in all provinces except Ontario (poor data quality) in a national file of information; size data for each week from 37–41 weeks stated in tables | Statistical outliers                                                                                                                                                                                                                                                                                                                                        | Low-Medium |
| 34 | Kulaga, 2013                                           | Poland            | 5,050                         | Wt, Ht      | 3 years – 6 years | Children throughout Poland in 81 different primary care practices                                                                                                | Diseases or medications affecting growth                                                                                                                                                                                                                                                                                                                    | Low        |
| 35 | Kumar, 2013                                            | India             | 19,501; B                     | Wt          | Birth             | Mother aged 20 – 39, early ultrasound to determine fetal age                                                                                                     | Birthweight $\pm 3$ SD from mean, maternal hypertension or diabetes, heart disease, and other diseases                                                                                                                                                                                                                                                      | Low-Medium |

\* B = Birth only, L = Longitudinal, CS = Cross-sectional, M = Mixed Longitudinal

\*\*Wt = weight, Ht = Length or Height, OFC = Head circumference

|    |                  |                      |                                        |             |                                         |                                                                                                                            |                                                                                                                                                                    |            |
|----|------------------|----------------------|----------------------------------------|-------------|-----------------------------------------|----------------------------------------------------------------------------------------------------------------------------|--------------------------------------------------------------------------------------------------------------------------------------------------------------------|------------|
| 36 | Lavallée, 1988   | Canada (Cree people) | 764; CS                                | Wt, Ht, OFC | Birth – 5 years                         | Cree children living in St. James Bay, Quebec                                                                              | One non-Cree parent or two non-Cree grandparents; children with proven growth problems, diabetes in the mother, congenital disorders, anemia, recent viral illness | Low-Medium |
| 37 | Lee, 2006        | Republic of Korea    | 18,427; B                              | Wt, Ht, OFC | Birth                                   | Births at 51 hospitals in South Korea                                                                                      | –                                                                                                                                                                  | Low-Medium |
| 38 | Loke, 2008       | Singapore            | 19,249                                 | Wt, Ht, OFC | Birth – 6 years                         | Children attending Singapore polyclinics                                                                                   | –                                                                                                                                                                  | Low-Medium |
| 39 | Marwaha, 2011    | India                | 64,629 (3-18 years); 2,459 (3-5 years) | Wt, Ht      | 3 years – 18 years                      | Children attending private schools in 4 geographical zones of India (north, south, east, west)                             | –                                                                                                                                                                  | Low        |
| 40 | Mazurin, 2000    | Russia               | Unknown                                | Wt, Ht, OFC | Birth – 18 years                        | Russian infants, children, and adolescents                                                                                 | –                                                                                                                                                                  | Low-Medium |
| 41 | McCowan, 2004    | New Zealand          | 10,292; B                              | Wt          | Birth                                   | Singletons born in the National Women's Hospital, Auckland                                                                 | Stillbirths, congenital abnormalities, preterm births                                                                                                              | Low        |
| 42 | Michaelsen, 1994 | Denmark              | 156; L                                 | Wt, Ht, OFC | Birth – 1 year                          | Singletons born in Hvidovre & Herlev Hospitals, Copenhagen; gestational age 37–41 weeks                                    | Malformations or perinatal disease, parents not Danish, birthweight for gestational age between 10 <sup>th</sup> and 90 <sup>th</sup> percentiles                  | Low        |
| 43 | Moon, 2000       | Republic of Korea    | 142,945; CS                            | Wt, Ht, OFC | Birth – 18 years (used birth data only) | Children living throughout South Korea; 0-6 years: children were enrolled in university hospitals and childcare facilities | –                                                                                                                                                                  | Low-Medium |

\* B = Birth only, L = Longitudinal, CS = Cross-sectional, M = Mixed Longitudinal

\*\*Wt = weight, Ht = Length or Height, OFC = Head circumference

|    |                   |               |                               |             |                    |                                                                                                                                       |                                                                                                                                                                                                                                                      |            |
|----|-------------------|---------------|-------------------------------|-------------|--------------------|---------------------------------------------------------------------------------------------------------------------------------------|------------------------------------------------------------------------------------------------------------------------------------------------------------------------------------------------------------------------------------------------------|------------|
| 44 | Nickavar, 2007    | Iran          | 2,832;<br>B                   | Wt, Ht, OFC | Birth              | Neonates born in government hospitals in Tehran at 37 – 42 weeks' gestation whose mothers had appropriate prenatal care; suitable SES | Cigarette smoking, premature rupture of membranes, malnutrition, preeclampsia or eclampsia, chromosomal anomalies, other anomalies in the neonate, maternal hypertension, diabetes, heart failure, autoimmune problems, placental disease, infection | Low        |
| 45 | Nielsen, 2010     | Denmark       | 4,105;<br>L                   | Wt, Ht      | Birth – 5 years    | Singletons                                                                                                                            | Preterm birth, conditions affecting growth                                                                                                                                                                                                           | Low        |
| 46 | Neyzi, 2008       | Turkey        | 4,493 (Birth – 5 years);<br>L | Wt, Ht, OFC | Birth – 18 years   | Economically advantaged children in Istanbul                                                                                          | –                                                                                                                                                                                                                                                    | Low-Medium |
| 47 | Olafsdottir, 2005 | Iceland       | 436;<br>B                     | Wt          | Birth              | Singletons born at term (>37 weeks)                                                                                                   | Pre-elampsia, hypertension, diabetes, stillbirths, preterm birth                                                                                                                                                                                     | Low        |
| 48 | Olsen, 2010       | United States | 57,115 (37-41 weeks);<br>B    | Wt, Ht, OFC | Birth              | Singletons born at 22-42 weeks in a large pediatric medical group; size data for each week from 37–41 weeks stated in tables          | Stillbirths, mortality before discharge, congenital anomalies, physiologically improbable measurements, unknown sex, missing data                                                                                                                    | Low        |
| 49 | Palczewska, 2001  | Poland        | 6,366;<br>CS                  | Wt, Ht, OFC | 1 month – 18 years | Children in Warsaw selected randomly from registry at Institute of Mother and Child (ages 0–3) and from local schools (ages 4–18).    | –                                                                                                                                                                                                                                                    | Low-Medium |
| 50 | Patwari, 1988     | Nigeria       | 1,530                         | Wt, Ht, OFC | Birth              | Singletons from privileged/well-to-do families born in the University of Maiduguri Teaching Hospital                                  | Stillbirths, preterm births, congenital malformations, maternal pre-eclampsia or eclampsia, antepartum hemorrhage, anemia, sickle cell disease                                                                                                       | Low        |

\* B = Birth only, L = Longitudinal, CS = Cross-sectional, M = Mixed Longitudinal

\*\*Wt = weight, Ht = Length or Height, OFC = Head circumference

|    |                 |             |               |             |                     |                                                                                                                                                       |                                                                                                                                                                                                        |                |
|----|-----------------|-------------|---------------|-------------|---------------------|-------------------------------------------------------------------------------------------------------------------------------------------------------|--------------------------------------------------------------------------------------------------------------------------------------------------------------------------------------------------------|----------------|
| 51 | Patsourou, 2012 | Greece      | 206;<br>L     | Wt, Ht, OFC | Birth –<br>3 years  | Breastfed infants in Thessaloniki and other parts of Greece, born between 38 and 42 weeks gestation with normal Apgar scores                          | Not exclusively breastfed up to 6 months, parents not married, parents not healthy, parents smokers, mother a vegan or vegetarian, birthweight < 2,500 g, health conditions that interfere with growth | Low            |
| 52 | Remontet, 1999  | France      | 7,423;<br>L   | Wt, Ht, OFC | Birth –<br>6 years  | Schoolchildren living in Rhone and Isère for whom gestational age at birth and length, weight, and OFC had been recorded in their health booklets.    | Preterm birth                                                                                                                                                                                          | Low-<br>Medium |
| 53 | Rios, 2008      | Mexico      | 79,706;<br>B  | Wt          | Birth               | Singletons born between 30-44 weeks gestational age in hospitals in the state of Chihuahua; size data for each week from 37–41 weeks stated in tables | Stillbirths, congenital malformations, statistical outliers (birthweights $\pm$ 2.58 SD from expected values)                                                                                          | Low            |
| 54 | Roberts, 1999   | Australia   | 664024;<br>B  | Wt          | Birth               | Singletons born throughout Australia from 20-44 weeks; size data for each week from 37–41 weeks stated in tables                                      | Stillbirths, mother born outside Australia, extreme statistical outliers                                                                                                                               | Low-<br>Medium |
| 55 | Roelants, 2009  | Belgium     | 15,989;<br>CS | Wt, Ht, OFC | Birth –<br>21 years | Subjects living in Flanders aged 0 – 25 years of age                                                                                                  | Preterm birth (<37 weeks) in the group aged 0–3 years, non-Belgian origin, growth disorders, severe chronic disease, use of a medication that may affect growth                                        | Low            |
| 56 | Rush, 2008      | New Zealand | 659;<br>L     | Wt, Ht      | Birth –<br>4 years  | Pacific Islanders living in South Auckland (at least one parent self-identified as being of Pacific Island descent), permanent New Zealand residents. | Low birthweight, baby not home within 6 weeks of birth, maternal diabetes. <b>NOTE (not exclusion):</b> Subgroup analysis of WHO compliant mothers (non-smoking, breastfeeding)                        | Low            |
| 57 | Rush, 2010      | New Zealand | 722;<br>L     | Wt, Ht      | Birth –<br>6 years  | Pacific Islanders living in South Auckland (at least one parent self-identified as being of Pacific Island descent), permanent New Zealand residents. | Diabetes in the mother                                                                                                                                                                                 | Low-<br>Medium |

\* B = Birth only, L = Longitudinal, CS = Cross-sectional, M = Mixed Longitudinal

\*\*Wt = weight, Ht = Length or Height, OFC = Head circumference

|    |                     |             |                 |             |                    |                                                                                                                                                             |                                                                                                                                                                                                                                                                                                                                                             |            |
|----|---------------------|-------------|-----------------|-------------|--------------------|-------------------------------------------------------------------------------------------------------------------------------------------------------------|-------------------------------------------------------------------------------------------------------------------------------------------------------------------------------------------------------------------------------------------------------------------------------------------------------------------------------------------------------------|------------|
| 58 | Rush, 2013          | New Zealand | 1,398;<br>L     | Wt, Ht, OFC | Birth – 10 years   | Pacific Islanders living in South Auckland (at least one parent self-identified as being of Pacific Island descent), permanent New Zealand residents.       | Diabetes in the mother                                                                                                                                                                                                                                                                                                                                      | Low-Medium |
| 59 | Saari, 2011         | Finland     | ~73,000<br>CS-L | Ht, Wt      | Birth – 20 years   | Patients attending public primary care clinics in Espoo (94.4% of Finnish origin)                                                                           | Diagnosis or medications affecting growth; prematurity                                                                                                                                                                                                                                                                                                      | Low        |
| 60 | Sankilampi, 2013    | Finland     | 188922;<br>B    | Wt, Ht, OFC | Birth              | Singletons or twins in the Finnish Birth Register (twin data not used in this systematic review); size data for each week from 37–41 weeks stated in tables | Stillbirths, congenital anomalies, statistical outliers, sex or gestational age unknown; triplets; maternal smoking or smoking status unknown; maternal hypertension or diabetes; in vitro fertilization                                                                                                                                                    | Low        |
| 61 | Schienkiewitz, 2011 | Germany     | 17,158;<br>CS   | OFC         | 3 months– 18 years | Part of the KiGGS study; nationwide study (all parts of Germany)                                                                                            | Prematurity (in children up to age 1), chronic renal or gastrointestinal diseases, primary or secondary short stature ( e.g. Down syndrome, cystic fibrosis), tall stature due precocious puberty or disease, tuberculosis, microcephaly, macrocephaly, cancers, congenital heart disease, use of growth hormones, steroid use, ADHD-drug use, tuberculosis | Low        |
| 62 | Segre, 2001         | Brazil      | 7,925;<br>B     | Wt          | Birth              | Singletons whose mothers were from a high-income population and who had prenatal care; size data for each week from 37–41 weeks stated in tables            | Infants with congenital malformations, stillbirths                                                                                                                                                                                                                                                                                                          | Low        |
| 63 | Skaerven, 2000      | Norway      | 1,655,058; B    | Wt          | Birth              | Singletons in the Medical Birth Registry of Norway; size data for each week from 37–41 weeks stated in tables                                               | Stillbirths, congenital malformations, cesarean sections                                                                                                                                                                                                                                                                                                    | Low        |



\* B = Birth only, L = Longitudinal, CS = Cross-sectional, M = Mixed Longitudinal

\*\*Wt = weight, Ht = Length or Height, OFC = Head circumference

|    |                     |                |                           |             |                     |                                                                                                                                                                                                                   |                                                                                                                 |            |
|----|---------------------|----------------|---------------------------|-------------|---------------------|-------------------------------------------------------------------------------------------------------------------------------------------------------------------------------------------------------------------|-----------------------------------------------------------------------------------------------------------------|------------|
| 64 | Sobrillo, 2007      | Spain          | 6,443: CS<br>600: L       | Wt, Ht, OFC | Birth –<br>18 years | Used CS data here. Births in Hospital de Basurto; children attending public and private pediatric clinics; students from public and private schools                                                               | –                                                                                                               | Low-Medium |
| 65 | Sreeramareddy, 2008 | Nepal          | 400;<br>B                 | Wt          | Birth               | Singletons born in Western Regional Hospital, Pokhara                                                                                                                                                             | Congenital anomalies/dysmorphic features, preterm birth (<37 weeks)                                             | Low-Medium |
| 66 | Tanaka, 2013        | Japan          | 647;<br>L+CS              | Wt, Ht, OFC | Birth –<br>2 years  | Term birth (37 – 42 weeks), exclusive breastfeeding >4 months                                                                                                                                                     | Maternal smoking                                                                                                | Low-Medium |
| 67 | Tinnggaard, 2013    | Denmark        | 1,792;<br>L               | Wt, Ht, OFC | Birth –<br>20 years | High SES Caucasian children living around Copenhagen; gestational age $\geq 37$ and $\leq 42$ weeks; subset of singleton breastfed children of nonsmoking mothers who were not small or large for gestational age | Chronic diseases, use of medicines affecting growth                                                             | Low        |
| 68 | Uehara, 2011        | Japan          | 144,980; B                | Wt          | Birth               | Singletons in the Japan Society of Obstetrics and Gynecology Database; size data for each week from 37–41 weeks stated in tables                                                                                  | Stillbirths, Apgar score = 0 at 1 & 5 minutes, hydrops, malformations, sex or gestational age absent            | Low        |
| 69 | Urquia, 2011        | Argentina      | 3,322,317<br>B            | Wt          | Birth               | Singletons and twins (twins data not used here) born in Argentina at any gestational age; size data for each week from 37–41 weeks stated in tables                                                               | Stillbirths, records with missing information (sex, birthweight, gestational age, mother's place of residence,) | Low-Medium |
| 70 | Vignerová, 2006     | Czech Republic | 18,584 (0–6 years);<br>CS | Wt, Ht, OFC | Birth –<br>19 years | Infants, children, and adolescents living throughout the Czech Republic                                                                                                                                           | –                                                                                                               | Low-Medium |
| 71 | Voigt, 2010         | Germany        | 2,093,205;<br>B           | Wt, Ht, OFC | Birth               | Singletons born throughout Germany between 20 and 43 weeks' gestation; size data for each week from 37–41 weeks stated in tables                                                                                  | Statistically outlying measurements                                                                             | Low-Medium |
| 72 | Webster, 2013       | Australia      | 159;<br>L                 | Wt, Ht, OFC | Birth –<br>2 years  | Aboriginal infants born and living in Sydney, New South Wales                                                                                                                                                     | Birthweight < 1,500 g                                                                                           | Low-Medium |

|          |                                                            |                         |                 |                            |                     |                                                                                                                                                   |                                                                                                               |                  |
|----------|------------------------------------------------------------|-------------------------|-----------------|----------------------------|---------------------|---------------------------------------------------------------------------------------------------------------------------------------------------|---------------------------------------------------------------------------------------------------------------|------------------|
| 73       | WHO MGRS, 2006                                             | MGRS                    | 7,551;<br>L & M | Wt, Ht                     | Birth –<br>5 years  | High SES, non-smoking mother, breastfed infants                                                                                                   | –                                                                                                             | Low-Medium       |
| 74       | WHO MGRS, 2007                                             | MGRS                    | 7,551;<br>L & M | OFC                        | Birth –<br>5 years  | High SES, non-smoking mother, breastfed infants                                                                                                   | –                                                                                                             | Low-Medium       |
| 75       | Willows, 2011                                              | Canada                  | 1,057;<br>B     | Wt, Ht, OFC                | Birth               | Cree ethnicity, singletons, term birth (37–41 weeks)                                                                                              | –                                                                                                             | Low-Medium       |
| 76       | Wright, 2011                                               | UK                      | 15,910;<br>L    | OFC                        | Birth –<br>3 years  | Children in the Southampton Women’s Survey and the Avon Longitudinal Study                                                                        | Preterm birth (<37 weeks)                                                                                     | Low-Medium       |
| 77       | Yunis, 2007                                                | Lebanon                 | 23,234;<br>B    | Wt, Ht, OFC                | Birth               | Singletons born in 9 tertiary care centers throughout Lebanon at 28-42 weeks gestation; size data for each week from 37–41 weeks stated in tables | Stillbirths, missing data                                                                                     | Low-Medium       |
| 78       | Zaki, 2008                                                 | Egypt                   | 27,826;<br>CS   | OFC                        | Birth –<br>18 years | Children living in greater Cairo                                                                                                                  | Low SES, major genetic or organic diseases known to affect growth                                             | Low              |
| 79       | Zong, 2013<br>Li, 2009<br>(Same data; different languages) | China (mainland)        | 69,760;<br>CS   | Wt, Ht, OFC                | Birth –<br>7 years  | Resident of one of seven provincial capital cities                                                                                                | Premature birth, Temporary residents, birthweight <2500 g, chronic illness, malnourishment, physical handicap | Low              |
| <b>#</b> | <b>First Author, year</b>                                  | <b>Country or group</b> | <b>n, Type*</b> | <b>What was measured?*</b> | <b>Subject ages</b> | <b>Inclusion criteria</b>                                                                                                                         | <b>Exclusion criteria</b>                                                                                     | <b>Bias risk</b> |

\* B = Birth only, L = Longitudinal, CS = Cross-sectional, M = Mixed Longitudinal

\*\*Wt = weight, Ht = Length or Height, OFC = Head circumference
